# Supplementary material for: Functionalization of benzothiadiazole in magnesium-based metal–organic framework for C 2 H 2 /CO 2 separation
Source: Royal Society of Chemistry journal article supplement (doi:10.1039/d5dt02980e), 2026-01-01
Supplement: d5dt02980e1.pdf [file d5dt02980e1.pdf]

## Supporting Information

### Functionalization of benzothiadiazole in magnesium-based metal-organic framework for C<sub>2</sub>H<sub>2</sub>/CO<sub>2</sub> separation

Haiyi Sun,<sup>a</sup> Yunlei Liu,<sup>b</sup> Meng Sun,<sup>a</sup> Fei Gao,<sup>a</sup> Xueying Feng,<sup>a</sup> Mingming Xu<sup>\*a,b</sup> and Xiaokang Wang<sup>\*a</sup>

<sup>a</sup>Shandong Key Laboratory of Intelligent Energy Materials, State Key Laboratory of Heavy Oil Processing, School of Materials Science and Engineering, China University of Petroleum (East China), Qingdao, Shandong 266580, China.

<sup>b</sup>Technology Inspection Center, Shengli Oilfield Company, SINOPEC, Dongying, Shandong, 257000, China.

*\*Corresponding author E-mail:* xiaokangwang0625@163.com; xumingming.slyt@sinopec.com

## Table of Contents

|                                              |     |
|----------------------------------------------|-----|
| Experimental Procedures.....                 | S2  |
| Materials and instruments .....              | S2  |
| Synthesis of H <sub>2</sub> BTDC ligand..... | S3  |
| Synthesis of UPC-116 .....                   | S4  |
| Single-crystal X-ray diffraction .....       | S5  |
| Gas sorption measurements .....              | S6  |
| Breakthrough experiments .....               | S7  |
| Computational methods .....                  | S8  |
| Figures S1-S12.....                          | S10 |
| Tables S1-S4 .....                           | S16 |
| References.....                              | S20 |

## **Experimental Procedures**

### **Materials and instruments**

All reagents were commercially available and used without further purification.

<sup>1</sup>H NMR spectrum was obtained on an Inova 400 MHz spectrometer. Single crystal X-ray diffraction experiments were carried out on a SuperNova diffractometer equipped with mirror Cu-K $\alpha$  radiation ( $\lambda = 1.54184$  Å) and an Eos CCD detector. Powder X-ray diffraction (PXRD) was carried out on a Bruker D8-Focus Bragg-Brentano X-ray powder diffractometer equipped with a Cu sealed tube at 40 kV and 15 mA. Thermogravimetric analysis (TGA) was performed on a Mettler Toledo TGA/DSC1 instrument under a static N<sub>2</sub> atmosphere with a heating rate of 10°C/min at the range of 40-900°C. Gas sorption measurements were conducted on a Micromeritics ASAP 2020 surface area analyzer.

### Synthesis of H<sub>2</sub>BTDC ligand

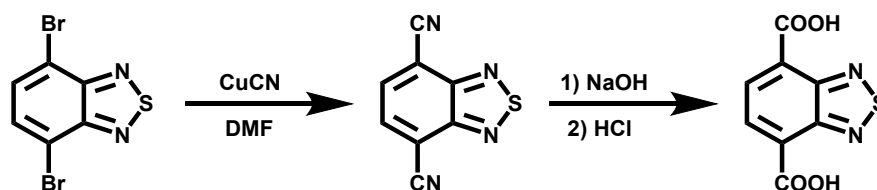

**Scheme S1.** Synthetic procedure for H<sub>2</sub>BTDC.

A mixture of 4,7-dibromo-2,1,3-benzothiadiazole (11.9 mmol, 3.5 g), CuCN (24.1 mmol, 2.2 g), in 35 mL N,N'-dimethylformamide (DMF) was refluxed for 48 h under the N<sub>2</sub> atmosphere. The cooled mixture was poured into 2 M HCl (200 mL) and extracted with ethyl acetate (2 × 100 mL). The combined organic phase was washed with brine solution and then dried over anhydrous Na<sub>2</sub>SO<sub>4</sub>. The solvent was removed by rotary evaporation and the crude product was purified by column chromatography. After dissolved in 25% aqueous sodium hydroxide solution and refluxed for 24 h, the yellow solution was poured into 200 mL H<sub>2</sub>O and acidified with concentrated HCl. The obtained reddish-brown precipitate was collected by filtration with a yield of 80%. <sup>1</sup>H NMR (400 MHz, DMSO-d<sub>6</sub>) δ (ppm): 8.57 (d, 2H), 6.71 (d, 2H).

### Synthesis of UPC-116

A mixture of H<sub>2</sub>BTDC (4 mg) and Mg(NO<sub>3</sub>)<sub>2</sub>·6H<sub>2</sub>O (20 mg) in 3 mL N,N'-dimethylformamide (DMF)/dioxane/H<sub>2</sub>O (v/v/v = 5/2/1) was placed into a glass vial (10 mL) and heated at 100°C for 48 h. The vial was then cooled to room temperature at a rate of 5°C/h. The obtained brownish red block crystals (3.6 mg, 70% yield based on H<sub>2</sub>BTDC) were filtered, washed with DMF and dried in air.

### Single-crystal X-ray diffraction

The as-synthesized crystals were taken from the mother liquid without further treatment, transferred to oil and mounted on to a loop for single crystal X-ray data collection. The data were collected on an Agilent Technologies SuperNova diffractometer equipped with graphite monochromatic Cu K $\alpha$  radiation ( $\lambda = 1.54184$  Å). With the help of Olex2, the structure was solved with the Superflip structure solution program using charge flipping and refined with the ShelXL refinement package using least squares minimization. The structure was treated anisotropically, whereas the hydrogen atoms were placed in calculated ideal positions and refined as riding on their respective nonhydrogen atoms. PLATON and SQUEEZE were used to calculate the diffraction contribution of the solvent molecules and thereby produced a set of partly solvent-free diffraction intensities.

## Gas sorption measurements

The activated samples were prepared by immersing the as-synthesized MOFs in chromatography-grade methanol and dichloromethane for solvent exchange, followed by activation under vacuum for 8 h at 373 K. Gas adsorption experiments containing  $C_2H_2$  and  $CO_2$  at 273 and 298 K, and  $N_2$  at 77 K were performed by using ASAP-2020 surface area analyzer. The Brunauer-Emmett-Teller (BET) specific surface area and the pore size distribution were calculated based on the  $N_2$  adsorption isotherm at 77 K. Liquid nitrogen bath was used to stabilize the temperature at 77 K, whereas other test temperatures were maintained via a circulating water bath.

## Breakthrough experiments

Breakthrough experiments were carried out on BSD-MAB multi-component adsorption breakthrough curve analyzer. The activated samples were packed in a quartz tube and further flushed with He at 373 K for 10 h with a flow rate of 15 mL/min. During the experiments at 298 K, the equimolar C<sub>2</sub>H<sub>2</sub>/CO<sub>2</sub> mixture was used at a flow rate of 2 mL/min, and the outlet gas was monitored by Hiden HPR-20EGA mass spectrometer. The captured gas during the breakthrough experiment can be recovered by desorption process at 298 K with He at a flow rate of 10 mL/min.

## Computational methods

### Isosteric heat of adsorption

A Virial equation comprising the temperature-independent parameters  $a_i$  and  $b_j$  was employed to calculate the enthalpies of adsorption for  $C_2H_2$  and  $CO_2$ , which were measured at 273 and 298 K.

$$\ln P = \ln N + \frac{1}{T} \sum_i^m a_i N_i + \sum_j^n b_j N_j$$

$$Q_{st} = -R \sum_{i=0}^m a_i N_i$$

Here,  $P$  is the pressure expressed in mmHg,  $N$  is the amount absorbed in mmol/g,  $T$  is the temperature in K,  $a_i$  and  $b_j$  are virial coefficients, and  $m$ ,  $n$  represent the number of coefficients required to adequately describe the isotherms (herein,  $m=5$  and  $n=2$ ).  $Q_{st}$  is the coverage-dependent isosteric heat of adsorption and  $R$  is the universal gas constant.

### Selectivity based on ideal adsorbed solution theory

Before estimating the selectivity for binary gas mixture, the single-component gas adsorption isotherms were first fitted to dual-site Langmuir-Freundlich (DSLFF) model:

$$q = q_{A,sat} \frac{b_A p^{n_1}}{1 + b_A p^{n_1}} + q_{B,sat} \frac{b_B p^{n_2}}{1 + b_B p^{n_2}}$$

where  $q$  is the amount of adsorbed gas (mmol/g),  $p$  is the bulk gas phase pressure (kPa),  $q_{sat}$  is the saturation amount (mmol/g),  $b$  is the Langmuir-Freundlich parameter ( $kPa^{-1}$ ), and  $n$  is the Langmuir-Freundlich exponent (dimensionless) for two adsorption sites A and B indicating the presence of weak and strong adsorption sites.  $b_A$  and  $b_B$  are both temperature-dependent.

$$b_A = b_{A0} \exp\left(\frac{E_A}{RT}\right); b_B = b_{B0} \exp\left(\frac{E_B}{RT}\right)$$

The adsorption selectivity  $S_{ads}$  was calculated by ideal adsorbed solution theory:

$$S_{ads} = \frac{q_1/q_2}{p_1/p_2}$$



where  $q_1$  and  $q_2$  are the molar loadings in the adsorbed phase in equilibrium with the bulk gas phase,  $p_1$  and  $p_2$  are partial pressure.

### **Grand canonical Monte Carlo simulations**

Grand canonical Monte Carlo (GCMC) simulations were carried out using the Sorption module of Materials Studio package. The Locate and Metropolis methods were used to predict the possible binding sites of  $C_2H_2$  and  $CO_2$  onto the framework. During the simulation, the  $C_2H_2$  and  $CO_2$  molecules including the frameworks were considered as rigid bodies. The optimal adsorption sites were simulated under 298 K and 100 kPa by the fixed loading task and Metropolis method. The atomic partial charges of the host MOF skeleton and all gas molecules were obtained from QEq method. The equilibration steps and the production steps were set to  $5.0 \times 10^6$  and  $1.0 \times 10^7$ , respectively. The gas-skeleton interaction and the gas-gas interaction were characterized by the standard universal force field (UFF). The cut-off radius used for the Lennard-Jones interactions is 15.5 Å and the long-range electrostatic interactions were considered by the Ewald summation method.

### **Density functional theory calculations**

Density functional theory (DFT) calculations were performed using Dmol3 module embedded in the Materials Studio software. Since it is a vast task to do the DFT calculations using a whole MOF unit cell, we used fragmented cluster models cleaved from unit cells representing the actual situations as high as possible, and the cleaved bonds at cluster boundaries were saturated by protons. The generalized gradient approximation (GGA) with the Perdew Burke Ernzerh of (PBE) exchange-correlation functional was employed for the spin-unrestricted DFT calculations. The electronic wave functions were expanded by the double numerical plus polarization (DNP) basis set. The van der Waals correction was considered by Grimme to precisely describe the adsorption/penetration of gas molecules on/through the g-GYN and g-GYH membranes. The convergence criterion was  $1 \times 10^{-5}$  Ha for energies,  $2 \times 10^{-3}$  Ha/Å for forces, and  $5 \times 10^{-3}$  Å for atomic displacements. The global cutoff radius was set as 6.0 Å. In all the DFT calculations, all the atoms were allowed to fully relax. The

adsorption energy ( $\Delta E_{\text{ads}}$ ) is expressed by

$$\Delta E_{\text{ads}} = E_{\text{ads+fram}} - E_{\text{fram}} - E_{\text{ads}}$$

where  $E_{\text{ads+fram}}$ ,  $E_{\text{fram}}$ , and  $E_{\text{ads}}$  are the total energy of the adsorbate-framework adsorption system, adsorbent framework, and adsorbate molecule, respectively.

Figures S1-S12

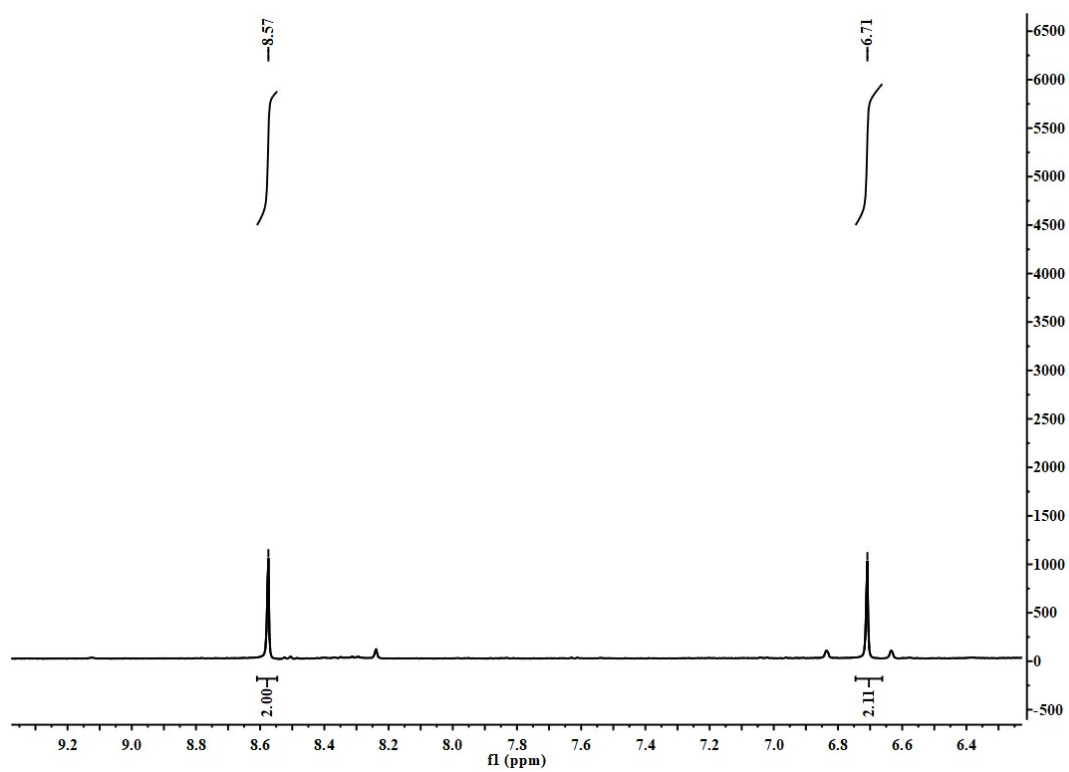

Fig. S1  $^1\text{H}$  NMR spectrum of  $\text{H}_2\text{BTDC}$ .

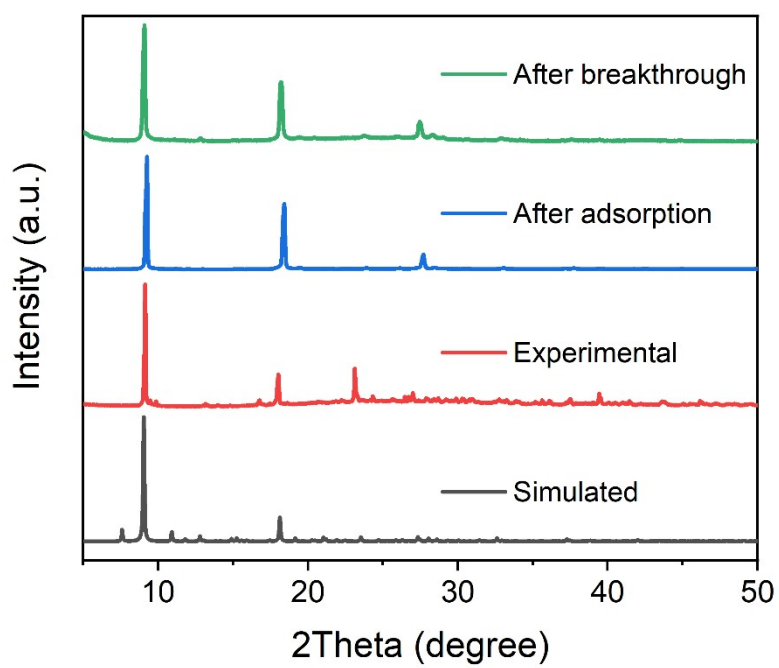

Fig. S2 PXRD patterns of UPC-116.

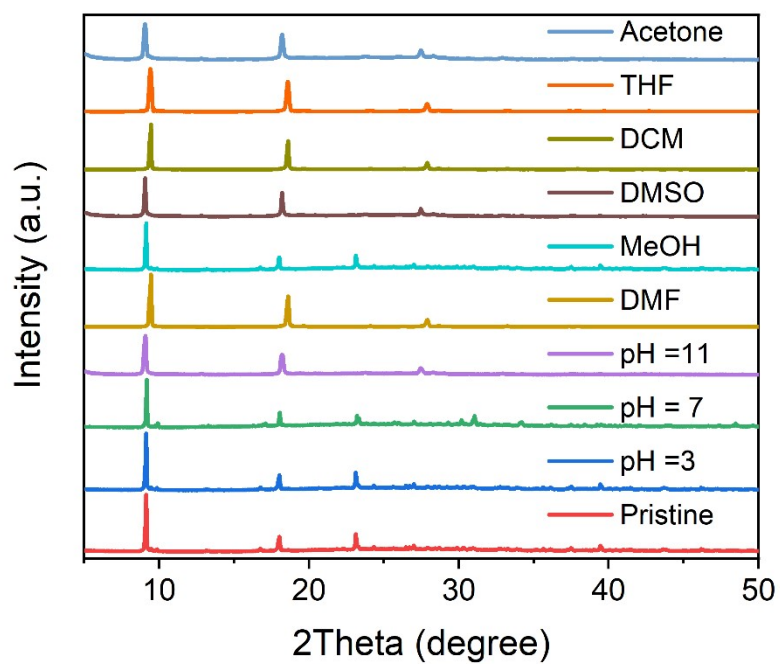

**Fig. S3** PXRD patterns of UPC-116 after treatment in different solutions for 24 h.

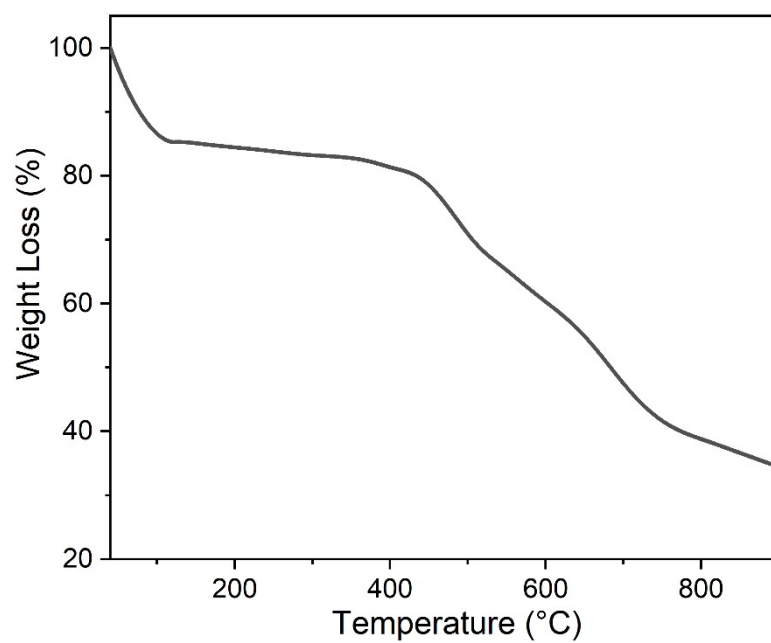

**Fig. S4** TGA curve of UPC-116.

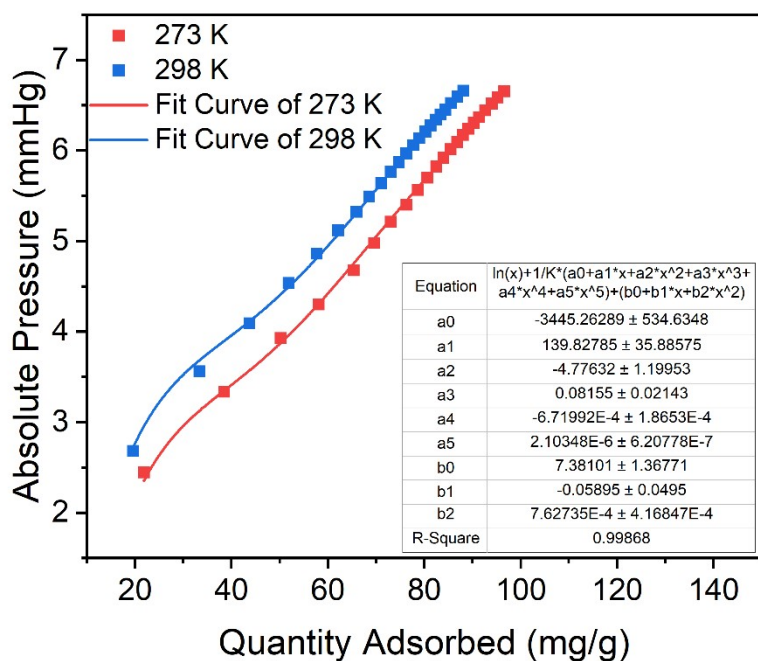

Fig. S5 Virial fitting of C<sub>2</sub>H<sub>2</sub> for UPC-116.

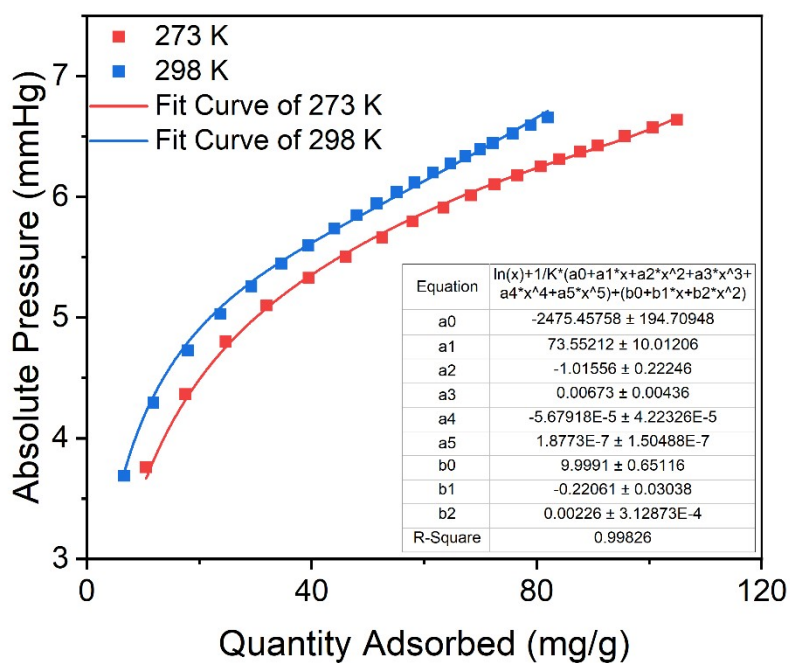

Fig. S6 Virial fitting of CO<sub>2</sub> for UPC-116.

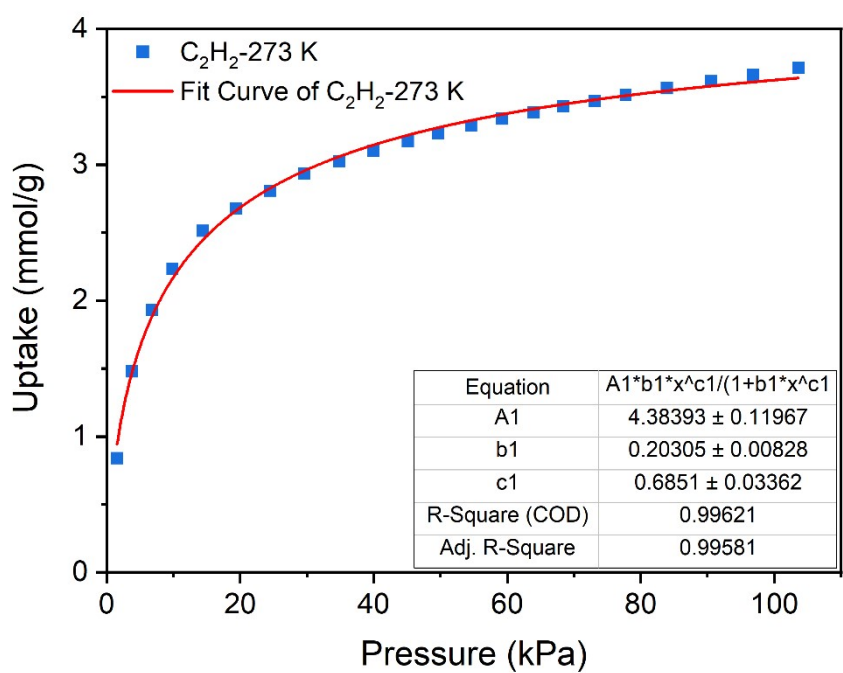

**Fig. S7** Langmuir-Freundlich fitting of  $C_2H_2$  for UPC-116 at 273 K.

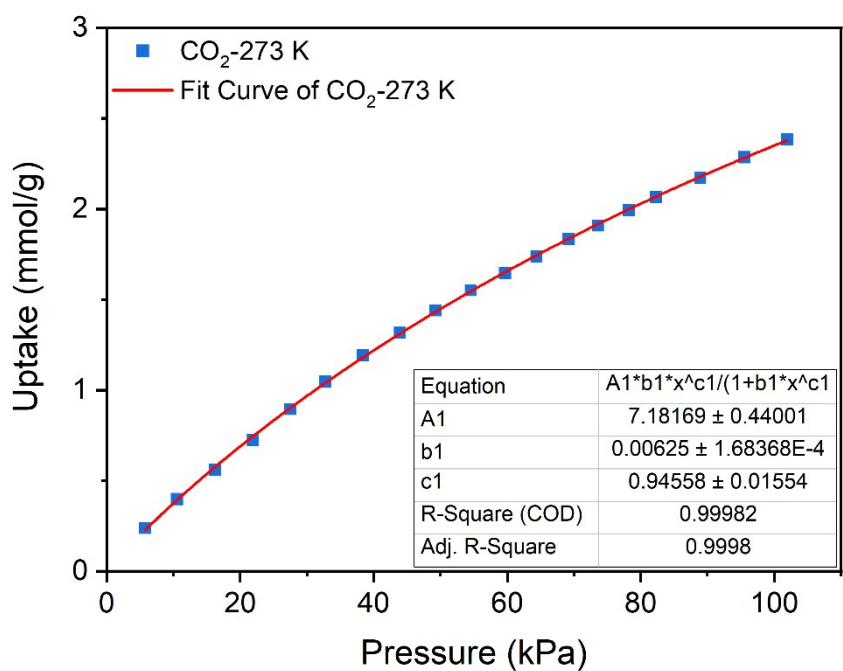

**Fig. S8** Langmuir-Freundlich fitting of  $CO_2$  for UPC-116 at 273 K.

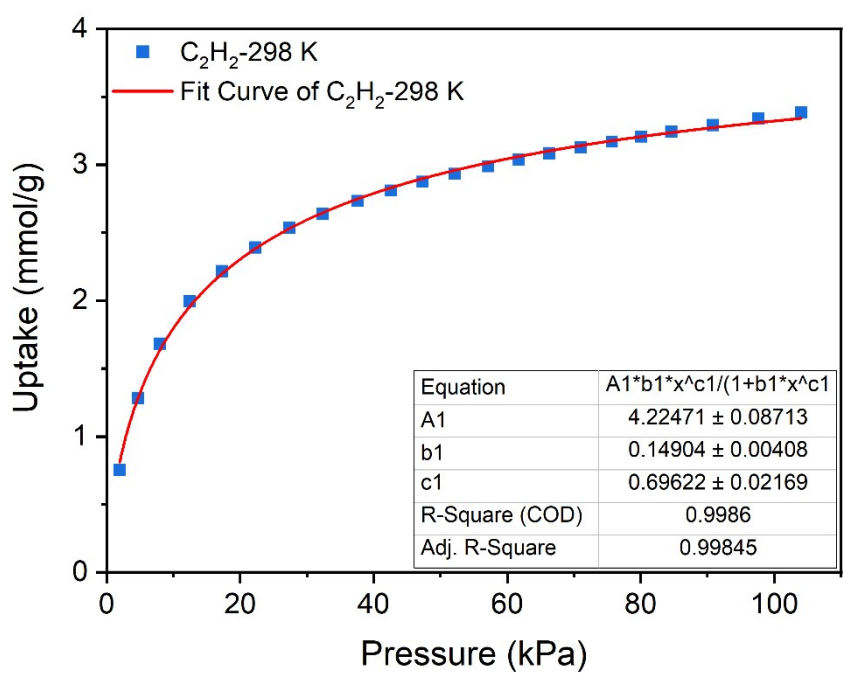

**Fig. S9** Langmuir-Freundlich fitting of  $C_2H_2$  for UPC-116 at 298 K.

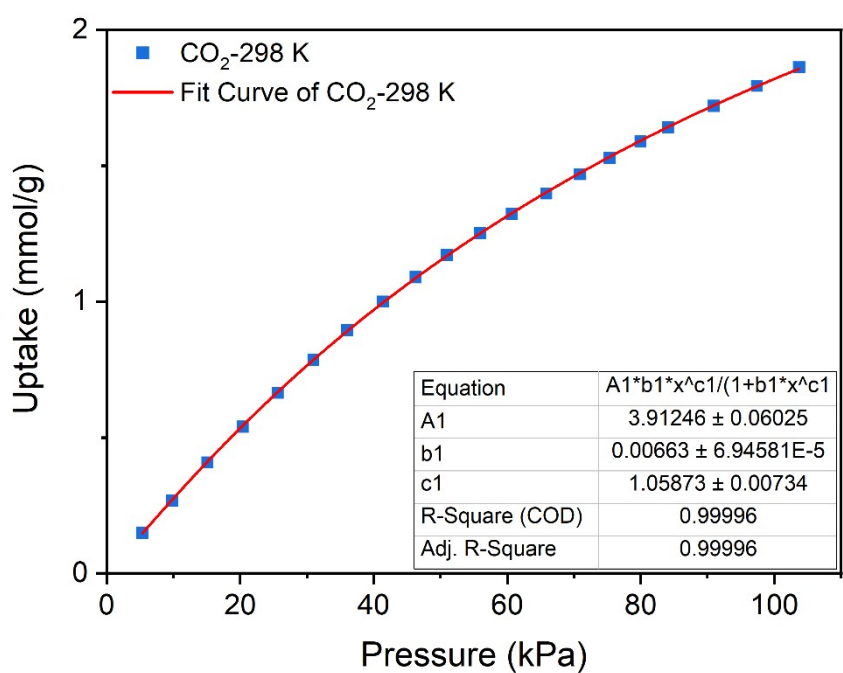

**Fig. S10** Langmuir-Freundlich fitting of  $CO_2$  for UPC-116 at 298 K.

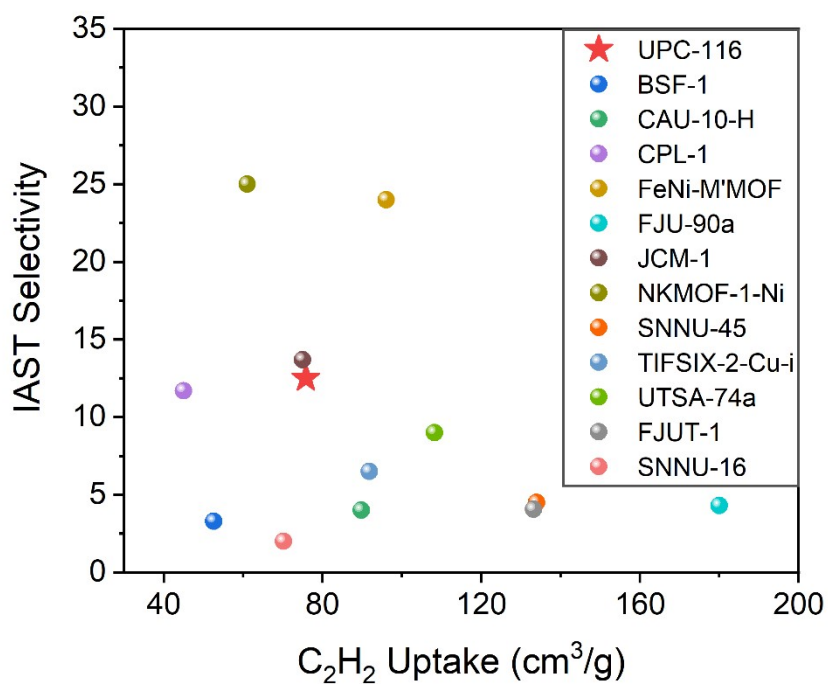

**Fig. S11** Comparison of  $C_2H_2$  uptake and IAST selectivity of equimolar  $C_2H_2/CO_2$  with reported MOFs at 298 K.

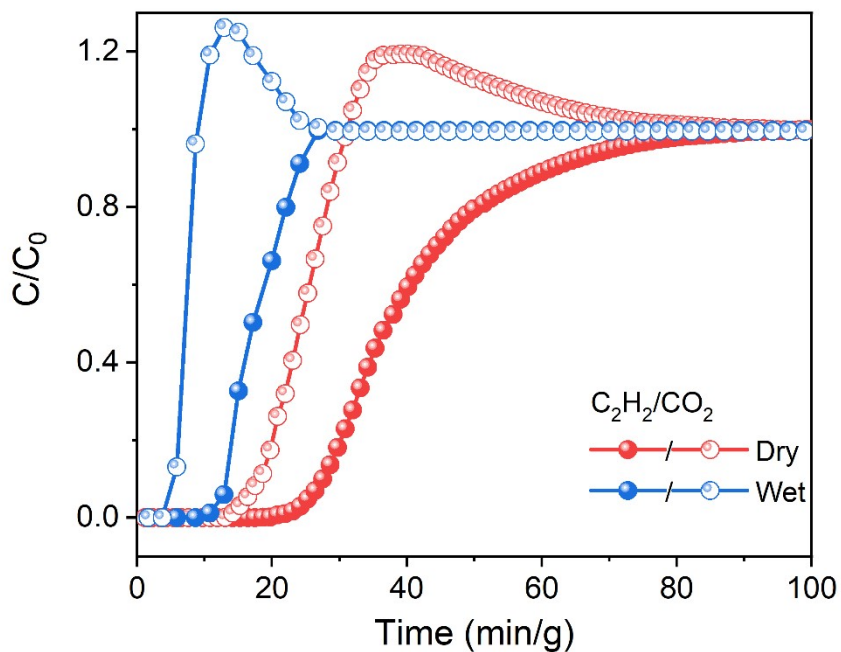

**Fig. S12** Breakthrough curves of equimolar  $C_2H_2/CO_2$  mixture (2 mL/min) on UPC-116 under dry and humid condition at 298 K and 1 bar.



## Tables S1-S4

**Table S1.** Crystal data of UPC-116.

| Compound                                           | UPC-116                                  |
|----------------------------------------------------|------------------------------------------|
| CCDC                                               | 2505745                                  |
| Formula                                            | $C_{23.5}H_{21.5}Mg_2N_{6.5}O_{10.5}S_2$ |
| Formula weight                                     | 675.71                                   |
| Temperature/K                                      | 293(2)                                   |
| Crystal system                                     | tetragonal                               |
| Space group                                        | $P4_12_12$                               |
| $a/\text{\AA}$                                     | 19.58922(16)                             |
| $b/\text{\AA}$                                     | 19.58922(16)                             |
| $c/\text{\AA}$                                     | 14.53473(18)                             |
| $\alpha/^\circ$                                    | 90                                       |
| $\beta/^\circ$                                     | 90                                       |
| $\gamma/^\circ$                                    | 90                                       |
| Volume/ $\text{\AA}^3$                             | 5577.52(11)                              |
| Z                                                  | 8                                        |
| $\rho/\text{g cm}^{-3}$                            | 1.609                                    |
| $\mu/\text{mm}^{-1}$                               | 2.812                                    |
| F(000)                                             | 2740.0                                   |
| $2\theta$ range for data collection                | 7.574 to 141.346                         |
|                                                    | $-23 \leq h \leq 16$                     |
| Index ranges                                       | $-23 \leq k \leq 17$                     |
|                                                    | $-17 \leq l \leq 15$                     |
| Reflections collected                              | 11861                                    |
| $R_{\text{int}}$                                   | 0.0265                                   |
| Data/restraints/parameters                         | 5201/0/290                               |
| Goodness-of-fit on $F^2$                           | 1.058                                    |
| Final R indexes [ $I \geq 2\sigma(I)$ ]            | $R_1 = 0.0343$<br>$wR_2 = 0.0925$        |
| Final R indexes [all data]                         | $R_1 = 0.0369$<br>$wR_2 = 0.0948$        |
| Largest diff. peak/hole $/\text{e}\text{\AA}^{-3}$ | 0.22/-0.39                               |

**Table S2.** Comparison of separation performance in MOFs at 298 K.

| Materials                                | C <sub>2</sub> H <sub>2</sub> uptake (cm <sup>3</sup> /g) | C <sub>2</sub> H <sub>2</sub> $Q_{st}$ (kJ/mol) | IAST selectivity | Ref.      |
|------------------------------------------|-----------------------------------------------------------|-------------------------------------------------|------------------|-----------|
| UPC-116                                  | 83.20                                                     | 28.64                                           | 12.27            | This work |
| BSF-1                                    | 52.6                                                      | 31                                              | 3.3              | 1         |
| CAU-10-H                                 | 89.8                                                      | 27.4                                            | 4.0              | 2         |
| CPL-1                                    | 45.0                                                      | 45.5                                            | 11.7             | 3         |
| FeNi-M'MOF                               | 96.1                                                      | 27                                              | 24               | 4         |
| FJU-90a                                  | 180                                                       | 25.1                                            | 4.3              | 5         |
| JCM-1                                    | 75                                                        | 36.9                                            | 13.7             | 6         |
| JNU-1                                    | —                                                         | 13                                              | 3.6              | 7         |
| Ni(4-DPDS) <sub>2</sub> CrO <sub>4</sub> | 67.0                                                      | 75.4                                            | 67.7             | 8         |
| NKMOF-1-Ni                               | 61.0                                                      | 60.3                                            | 25               | 9         |
| SNNU-45                                  | 134                                                       | 39.9                                            | 4.5              | 10        |
| TIFSIX-2-Cu-i                            | 91.8                                                      | 46.3                                            | 6.5              | 11        |
| UTSA-300a                                | 68.9                                                      | 57.6                                            | 743              | 12        |
| UTSA-74a                                 | 108.2                                                     | 31                                              | 9                | 13        |
| ZJU-74                                   | 85.7                                                      | 45                                              | 36.5             | 14        |
| FJUT-1                                   | 133.2                                                     | 43.75                                           | 4.06             | 15        |
| JXNU-5                                   | 55.9                                                      | 32.9                                            | —                | 16        |
| M'MOF-2a                                 | —                                                         | 37.7                                            | 1.89             | 17        |
| Ni(dpip)                                 | 83.6                                                      | 41.7                                            | 2                | 18        |
| SNNU-16                                  | 70.2                                                      | 52.6                                            | 2.0              | 19        |

**Table S3** Raw gas adsorption data of UPC-116 at 273 K.

| C <sub>2</sub> H <sub>2</sub> adsorption |                                | C <sub>2</sub> H <sub>2</sub> desorption |                                | CO <sub>2</sub> adsorption |                                | CO <sub>2</sub> desorption |                                |
|------------------------------------------|--------------------------------|------------------------------------------|--------------------------------|----------------------------|--------------------------------|----------------------------|--------------------------------|
| Pressure<br>(kPa)                        | Uptake<br>(cm <sup>3</sup> /g) | Pressure<br>(kPa)                        | Uptake<br>(cm <sup>3</sup> /g) | Pressure<br>(kPa)          | Uptake<br>(cm <sup>3</sup> /g) | Pressure<br>(kPa)          | Uptake<br>(cm <sup>3</sup> /g) |
| 1.54216                                  | 18.82015                       | 103.60772                                | 83.20696                       | 4.31114                    | 7.32737                        | 105.13564                  | 75.66018                       |
| 3.75572                                  | 33.11618                       | 97.17458                                 | 82.10697                       | 8.28455                    | 13.08894                       | 98.91816                   | 73.99207                       |
| 6.78308                                  | 43.23492                       | 91.10969                                 | 81.07097                       | 12.80728                   | 19.58502                       | 93.08317                   | 72.22423                       |
| 9.83282                                  | 50.033                         | 85.0509                                  | 80.01785                       | 17.3829                    | 25.62023                       | 87.09763                   | 70.20565                       |
| 14.35148                                 | 56.32429                       | 78.71542                                 | 78.8633                        | 22.08264                   | 31.01051                       | 81.21788                   | 68.05719                       |
| 19.39504                                 | 59.9676                        | 72.50201                                 | 77.64016                       | 26.91461                   | 35.82664                       | 75.61685                   | 65.88748                       |
| 24.46505                                 | 62.90519                       | 66.64057                                 | 76.41604                       | 31.78931                   | 40.20492                       | 70.09925                   | 63.55404                       |
| 29.54931                                 | 65.73102                       | 60.83203                                 | 75.13183                       | 36.59077                   | 44.18573                       | 64.38836                   | 60.98878                       |
| 34.8126                                  | 67.76146                       | 55.20659                                 | 73.77152                       | 41.27626                   | 47.54135                       | 58.89517                   | 58.25433                       |
| 39.93551                                 | 69.48729                       | 49.41636                                 | 72.25925                       | 46.1123                    | 50.77843                       | 53.47318                   | 55.3085                        |
| 45.10929                                 | 71.07189                       | 43.74616                                 | 70.6544                        | 50.55569                   | 53.5814                        | 48.24244                   | 52.24992                       |
| 49.61777                                 | 72.31478                       | 38.17769                                 | 68.89511                       | 54.818                     | 56.00991                       | 43.05849                   | 48.87762                       |
| 54.57385                                 | 73.61293                       | 32.6906                                  | 66.94285                       | 59.50145                   | 58.42366                       | 37.85827                   | 45.22942                       |
| 59.22069                                 | 74.77764                       | 25.99501                                 | 63.75554                       | 64.01197                   | 60.68813                       | 32.78622                   | 41.2252                        |
| 63.94687                                 | 75.81651                       | 19.18955                                 | 59.81916                       | 68.82767                   | 62.86131                       | 26.36733                   | 35.53881                       |
| 68.40653                                 | 76.80908                       | 13.20197                                 | 54.72385                       | 73.59861                   | 64.87986                       | 20.69713                   | 29.82514                       |
| 73.0676                                  | 77.75493                       | 7.95496                                  | 45.84712                       | 77.86906                   | 66.68112                       | 15.68001                   | 24.02416                       |
| 77.73682                                 | 78.68318                       |                                          |                                | 81.93199                   | 68.15639                       | 10.92942                   | 17.60097                       |
| 83.88513                                 | 79.81483                       |                                          |                                | 86.23906                   | 69.70354                       | 6.58166                    | 10.64305                       |
| 90.4973                                  | 80.96637                       |                                          |                                | 92.62541                   | 71.83596                       |                            |                                |
| 96.82668                                 | 82.04749                       |                                          |                                | 98.73506                   | 73.76029                       |                            |                                |
| 103.60772                                | 83.20696                       |                                          |                                | 105.13564                  | 75.66018                       |                            |                                |

**Table S4** Raw gas adsorption data of UPC-116 at 298 K.

| C <sub>2</sub> H <sub>2</sub> adsorption |                                | C <sub>2</sub> H <sub>2</sub> desorption |                                | CO <sub>2</sub> adsorption |                                | CO <sub>2</sub> desorption |                                |
|------------------------------------------|--------------------------------|------------------------------------------|--------------------------------|----------------------------|--------------------------------|----------------------------|--------------------------------|
| Pressure<br>(kPa)                        | Uptake<br>(cm <sup>3</sup> /g) | Pressure<br>(kPa)                        | Uptake<br>(cm <sup>3</sup> /g) | Pressure<br>(kPa)          | Uptake<br>(cm <sup>3</sup> /g) | Pressure<br>(kPa)          | Uptake<br>(cm <sup>3</sup> /g) |
| 1.94907                                  | 16.85483                       | 104.00242                                | 75.87957                       | 5.33654                    | 3.35678                        | 103.683                    | 41.71629                       |
| 4.70177                                  | 28.7564                        | 97.4818                                  | 74.81773                       | 9.76975                    | 6.0089                         | 97.30072                   | 40.24385                       |
| 7.97327                                  | 37.68877                       | 91.13411                                 | 73.79612                       | 15.07169                   | 9.14503                        | 91.1809                    | 38.68402                       |
| 12.4492                                  | 44.66964                       | 84.82914                                 | 72.71523                       | 20.36144                   | 12.08816                       | 85.12008                   | 37.04022                       |
| 17.25676                                 | 49.66094                       | 78.64218                                 | 71.573                         | 25.61252                   | 14.87988                       | 79.30746                   | 35.41642                       |
| 22.27795                                 | 53.55463                       | 72.58339                                 | 70.39487                       | 30.95516                   | 17.60754                       | 73.42161                   | 33.66911                       |
| 27.36831                                 | 56.78478                       | 66.64464                                 | 69.19557                       | 35.98245                   | 20.03649                       | 67.53576                   | 31.8491                        |
| 32.33456                                 | 59.07492                       | 60.66926                                 | 67.79238                       | 41.36171                   | 22.405                         | 61.73739                   | 29.98955                       |
| 37.54089                                 | 61.22111                       | 54.69593                                 | 66.34131                       | 46.24862                   | 24.41315                       | 56.06515                   | 28.10195                       |
| 42.58445                                 | 62.95751                       | 49.01963                                 | 64.86469                       | 50.90562                   | 26.24419                       | 50.49872                   | 26.08421                       |
| 47.28825                                 | 64.39871                       | 43.33112                                 | 63.18628                       | 55.9146                    | 28.05154                       | 45.04215                   | 23.91738                       |
| 52.09988                                 | 65.6937                        | 37.74841                                 | 61.29256                       | 60.6652                    | 29.64209                       | 39.48588                   | 21.57906                       |
| 57.12107                                 | 66.94629                       | 32.16163                                 | 58.99518                       | 65.82269                   | 31.31347                       | 34.03135                   | 19.09381                       |
| 61.71907                                 | 68.04272                       | 24.54847                                 | 54.99541                       | 70.89271                   | 32.89875                       | 27.63483                   | 15.91236                       |
| 66.25605                                 | 69.11735                       | 17.82643                                 | 50.10269                       | 75.34423                   | 34.25478                       | 21.05521                   | 12.46641                       |
| 70.9395                                  | 70.06011                       | 12.08502                                 | 44.10165                       | 79.94427                   | 35.60307                       | 15.26294                   | 9.3095                         |
| 75.6372                                  | 71.01674                       | 6.90108                                  | 34.76131                       | 84.05806                   | 36.76171                       | 9.89182                    | 6.08111                        |
| 80.05617                                 | 71.83474                       |                                          |                                | 90.94286                   | 38.53778                       |                            |                                |
| 84.55041                                 | 72.66725                       |                                          |                                | 97.39431                   | 40.18722                       |                            |                                |
| 90.73737                                 | 73.73227                       |                                          |                                | 103.683                    | 41.71629                       |                            |                                |
| 97.57945                                 | 74.83345                       |                                          |                                |                            |                                |                            |                                |
| 104.00242                                | 75.87957                       |                                          |                                |                            |                                |                            |                                |

## References

- (1) Zhang, Y.; Yang, L.; Wang, L.; Duttwyler, S.; Xing, H. A Microporous Metal-Organic Framework Supramolecularly Assembled from a Cu<sup>II</sup> Dodecaborate Cluster Complex for Selective Gas Separation. *Angew. Chem. Int. Ed.* **2019**, *58* (24), 8145–8150. DOI: 10.1002/anie.201903600.
- (2) Pei, J.; Wen, H. M.; Gu, X. W.; Qian, Q. L.; Yang, Y.; Cui, Y.; Li, B.; Chen, B.; Qian, G. Dense Packing of Acetylene in a Stable and Low-Cost Metal-Organic Framework for Efficient C<sub>2</sub>H<sub>2</sub>/CO<sub>2</sub> Separation. *Angew. Chem. Int. Ed.* **2021**, *60* (47), 25068–25074. DOI: 10.1002/anie.202110820.
- (3) Yang, L.; Yan, L.; Wang, Y.; Liu, Z.; He, J.; Fu, Q.; Liu, D.; Gu, X.; Dai, P.; Li, L.; Zhao, X. Adsorption Site Selective Occupation Strategy within a Metal–Organic Framework for Highly Efficient Sieving Acetylene from Carbon Dioxide. *Angew. Chem. Int. Ed.* **2021**, *60* (9), 4570–4574. DOI: 10.1002/anie.202013965.
- (4) Gao, J.; Qian, X.; Lin, R. B.; Krishna, R.; Wu, H.; Zhou, W.; Chen, B. Mixed Metal–Organic Framework with Multiple Binding Sites for Efficient C<sub>2</sub>H<sub>2</sub>/CO<sub>2</sub> Separation. *Angew. Chem. Int. Ed.* **2020**, *59* (11), 4396–4400. DOI: 10.1002/anie.202000323.
- (5) Ye, Y.; Ma, Z.; Lin, R.-B.; Krishna, R.; Zhou, W.; Lin, Q.; Zhang, Z.; Xiang, S.; Chen, B. Pore Space Partition within a Metal–Organic Framework for Highly Efficient C<sub>2</sub>H<sub>2</sub>/CO<sub>2</sub> Separation. *J. Am. Chem. Soc.* **2019**, *141* (9), 4130–4136. DOI: 10.1021/jacs.9b00232.
- (6) Lee, J.; Chuah, C. Y.; Kim, J.; Kim, Y.; Ko, N.; Seo, Y.; Kim, K.; Bae, T. H.; Lee, E. Separation of Acetylene from Carbon Dioxide and Ethylene by a Water-Stable Microporous Metal–Organic Framework with Aligned Imidazolium Groups inside the Channels. *Angew. Chem. Int. Ed.* **2018**, *57* (26), 7869–7873. DOI: 10.1002/anie.201804442.
- (7) Zeng, H.; Xie, M.; Huang, Y. L.; Zhao, Y.; Xie, X. J.; Bai, J. P.; Wan, M. Y.; Krishna, R.; Lu, W.; Li, D. Induced Fit of C<sub>2</sub>H<sub>2</sub> in a Flexible MOF Through Cooperative Action of Open Metal Sites. *Angew. Chem. Int. Ed.* **2019**, *58* (25), 8515–8519. DOI: 10.1002/anie.201904160.
- (8) Zheng, F.; Chen, R.; Ding, Z.; Liu, Y.; Zhang, Z.; Yang, Q.; Yang, Y.; Ren, Q.; Bao, Z. Interlayer Symmetry Control in Flexible-Robust Layered Metal–Organic Frameworks for Highly Efficient C<sub>2</sub>H<sub>2</sub>/CO<sub>2</sub> Separation. *J. Am. Chem. Soc.* **2023**, *145* (36), 19903–19911. DOI: 10.1021/jacs.3c06138.
- (9) Peng, Y. L.; Pham, T.; Li, P.; Wang, T.; Chen, Y.; Chen, K. J.; Forrest, K. A.; Space, B.; Cheng, P.; Zaworotko, M. J.; Zhang, Z. Robust Ultramicroporous Metal–Organic Frameworks with Benchmark Affinity for Acetylene. *Angew. Chem. Int. Ed.* **2018**, *57* (34), 10971–10975. DOI: 10.1002/anie.201806732.
- (10) Li, Y. P.; Wang, Y.; Xue, Y. Y.; Li, H. P.; Zhai, Q. G.; Li, S. N.; Jiang, Y. C.; Hu, M. C.; Bu, X. Ultramicroporous Building Units as a Path to Bi-microporous Metal–Organic Frameworks with High Acetylene Storage and Separation Performance. *Angew. Chem. Int. Ed.* **2019**, *58* (38), 13590–13595. DOI: 10.1002/anie.201908378.
- (11) Chen, K.-J.; Scott, Hayley S.; Madden, David G.; Pham, T.; Kumar, A.; Bajpai, A.; Lusi, M.; Forrest, Katherine A.; Space, B.; Perry, John J.; Zaworotko, Michael J. Benchmark C<sub>2</sub>H<sub>2</sub>/CO<sub>2</sub> and CO<sub>2</sub>/C<sub>2</sub>H<sub>2</sub> Separation by Two Closely Related Hybrid Ultramicroporous Materials. *Chem* **2016**, *1* (5), 753–765. DOI: 10.1016/j.chempr.2016.10.009.
- (12) Lin, R.-B.; Li, L.; Wu, H.; Arman, H.; Li, B.; Lin, R.-G.; Zhou, W.; Chen, B. Optimized Separation of Acetylene from Carbon Dioxide and Ethylene in a Microporous Material. *J. Am. Chem. Soc.* **2017**, *139* (23), 8022–8028. DOI: 10.1021/jacs.7b03850.
- (13) Luo, F.; Yan, C.; Dang, L.; Krishna, R.; Zhou, W.; Wu, H.; Dong, X.; Han, Y.; Hu, T.-L.; O’Keeffe, M.; Wang, L.; Luo, M.; Lin, R.-B.; Chen, B. UTSA-74: A MOF-74 Isomer with Two Accessible Binding

- Sites per Metal Center for Highly Selective Gas Separation. *J. Am. Chem. Soc.* **2016**, *138* (17), 5678–5684. DOI: 10.1021/jacs.6b02030.
- (14) Pei, J.; Shao, K.; Wang, J. X.; Wen, H. M.; Yang, Y.; Cui, Y.; Krishna, R.; Li, B.; Qian, G. A Chemically Stable Hofmann-Type Metal–Organic Framework with Sandwich-Like Binding Sites for Benchmark Acetylene Capture. *Adv. Mater.* **2020**, *32* (24), 1908275. DOI: 10.1002/adma.201908275.
- (15) Zhang, L.; Xiao, T.; Zeng, X.; You, J.; He, Z.; Chen, C.-X.; Wang, Q.; Nafady, A.; Al-Enizi, A. M.; Ma, S. Isorecticular Contraction of Cage-like Metal–Organic Frameworks with Optimized Pore Space for Enhanced C<sub>2</sub>H<sub>2</sub>/CO<sub>2</sub> and C<sub>2</sub>H<sub>2</sub>/C<sub>2</sub>H<sub>4</sub> Separations. *J. Am. Chem. Soc.* **2024**, *146* (11), 7341–7351. DOI: 10.1021/jacs.3c12032.
- (16) Liu, R.; Liu, Q.-Y.; Krishna, R.; Wang, W.; He, C.-T.; Wang, Y.-L. Water-Stable Europium 1,3,6,8-Tetrakis(4-carboxylphenyl)pyrene Framework for Efficient C<sub>2</sub>H<sub>2</sub>/CO<sub>2</sub> Separation. *Inorg. Chem.* **2019**, *58* (8), 5089–5095. DOI: 10.1021/acs.inorgchem.9b00169.
- (17) Xiang, S.-C.; Zhang, Z.; Zhao, C.-G.; Hong, K.; Zhao, X.; Ding, D.-R.; Xie, M.-H.; Wu, C.-D.; Das, M. C.; Gill, R.; Thomas, K. M.; Chen, B. Rationally Tuned Micropores within Enantiopure Metal–Organic Frameworks for Highly Selective Separation of Acetylene and Ethylene. *Nat. Commun.* **2011**, *2*, 204. DOI: 10.1038/ncomms1206.
- (18) Li, Y.-Z.; Wang, G.-D.; Ma, L.-N.; Hou, L.; Wang, Y.-Y.; Zhu, Z. Multiple Functions of Gas Separation and Vapor Adsorption in a New MOF with Open Tubular Channels. *ACS Appl. Mater. Interfaces* **2021**, *13* (3), 4102–4109. DOI: 10.1021/acsami.0c21554.
- (19) Li, H.-P.; Dou, Z.-D.; Wang, Y.; Xue, Y. Y.; Li, Y. P.; Hu, M.-C.; Li, S.-N.; Jiang, Y.-C.; Zhai, Q.-G. Tuning the Pore Surface of an Ultramicroporous Framework for Enhanced Methane and Acetylene Purification Performance. *Inorg. Chem.* **2020**, *59* (22), 16725–16736. DOI: 10.1021/acs.inorgchem.0c02713.
